# Supplementary material for: Hydration of counterions in cation exchange resins studied by X-ray absorption fine structure
Source: Royal Society of Chemistry journal article supplement (doi:10.1039/b810997d), 2008-01-01
Supplement: b810997d.pdf [file b810997d.pdf]

## Electronic Supplementary Information

The results of the curve-fitting to the XAFS  $\chi$  spectra shown in Figure 1 are given in Fig.E1-E9. Also, a fitting to an equation,  $\chi = \alpha_1\chi_1 + \alpha_2\chi_2$ , for  $K^+$  in the hydrated resin is given in Fig.E10. Obviously, the  $\chi$  spectrum is best explained by this equation.

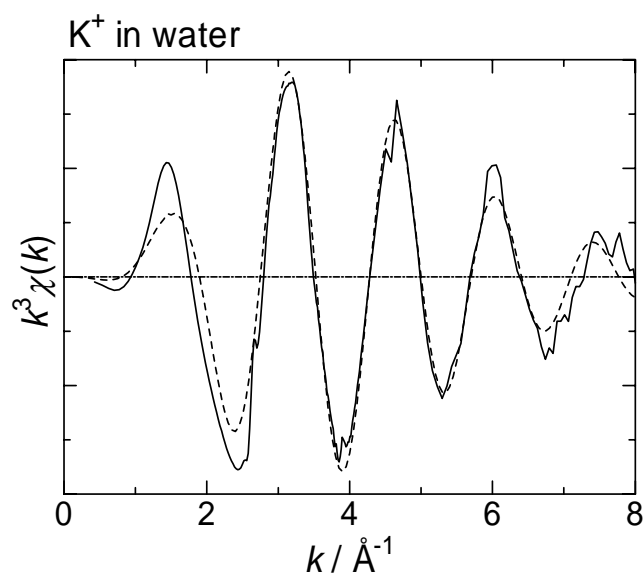

Fig.E1 XAFS spectrum for hydrated  $K^+$ . Solid curve, experimental spectrum. Broken curve, fitting with parameters listed in Table 1.

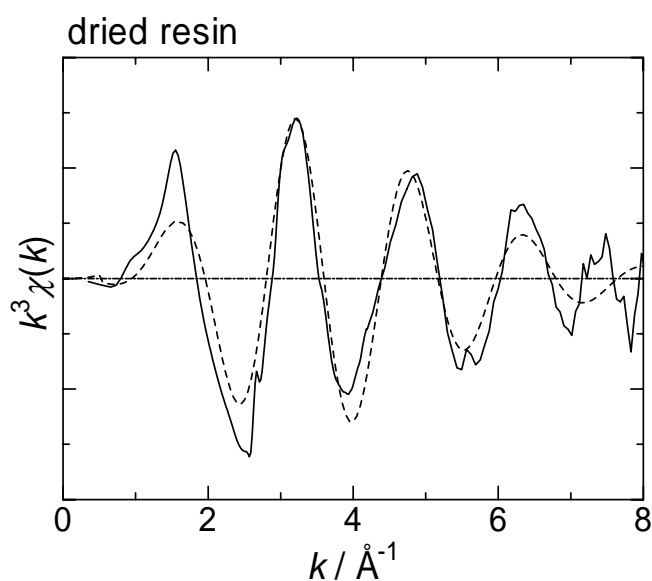

Fig.E2 XAFS spectrum for  $K^+$  in the dried resin. Solid curve, experimental spectrum. Broken curve, fitting with parameters listed in Table 1.

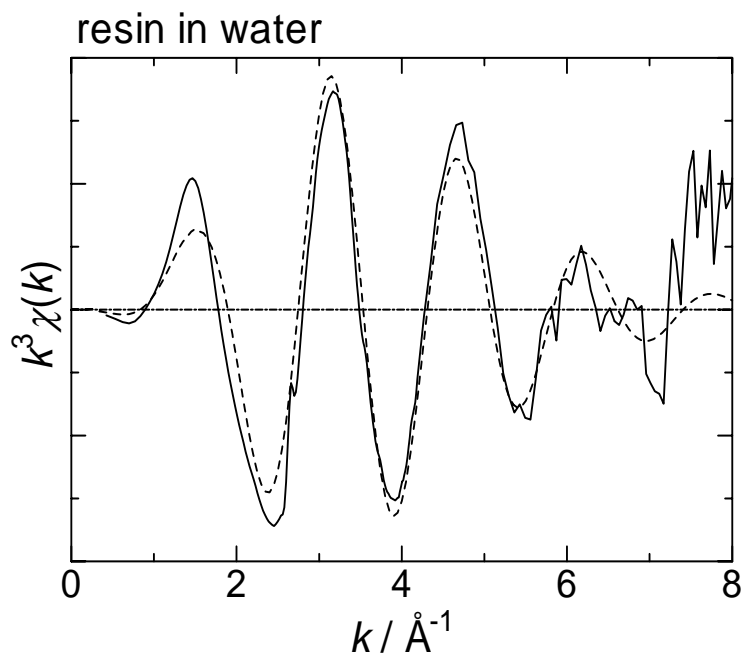

Fig.E3 XAFS spectrum for  $\text{K}^+$  in the hydrated resin. Solid curve, experimental spectrum. Broken curve, fitting with parameters listed in Table 1.

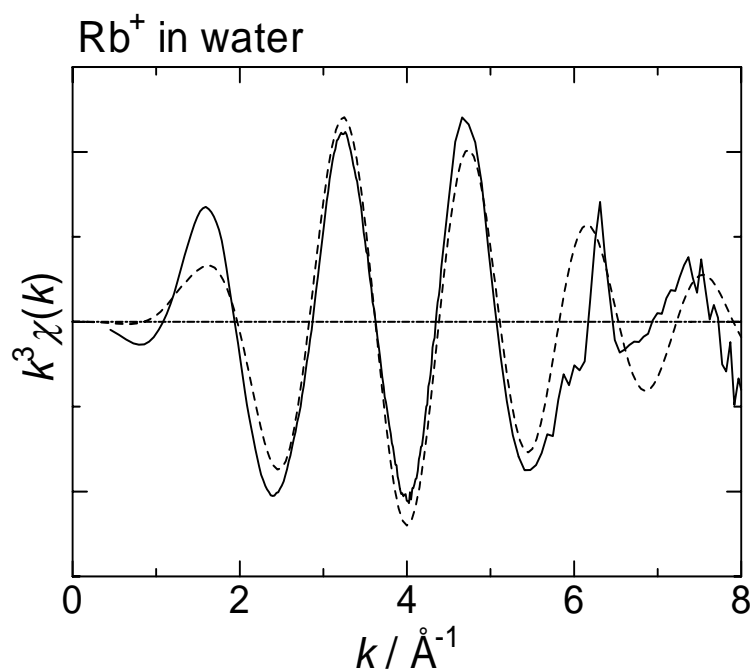

Fig.E4 XAFS spectrum for hydrated  $\text{Rb}^+$ . Solid curve, experimental spectrum. Broken curve, fitting with parameters listed in Table 1.

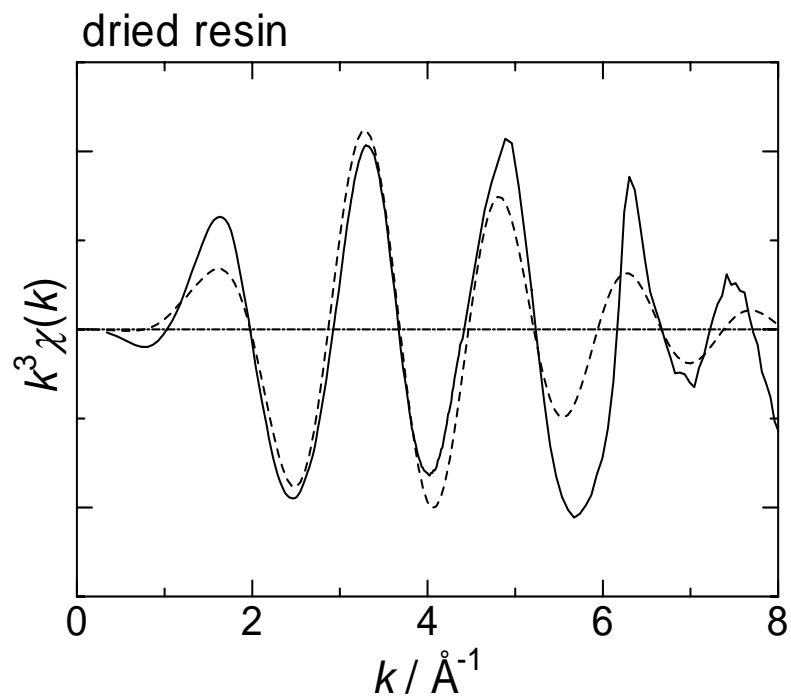

Fig.E5 XAFS spectrum for  $\text{Rb}^+$  in the dried resin. Solid curve, experimental spectrum. Broken curve, fitting with parameters listed in Table 1.

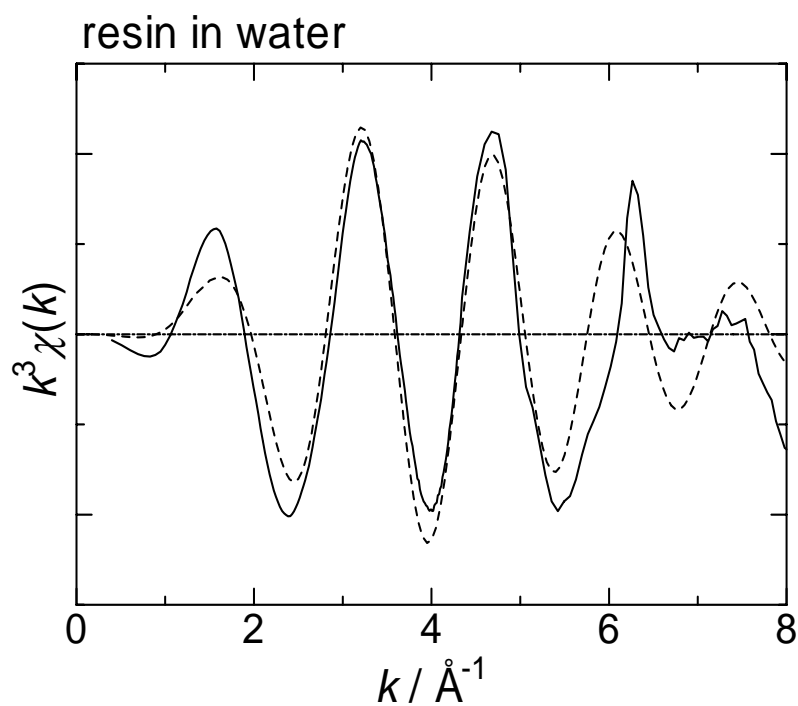

Fig.E6 XAFS spectrum for  $\text{Rb}^+$  in the hydrated resin. Solid curve, experimental spectrum. Broken curve, fitting with parameters listed in Table 1.

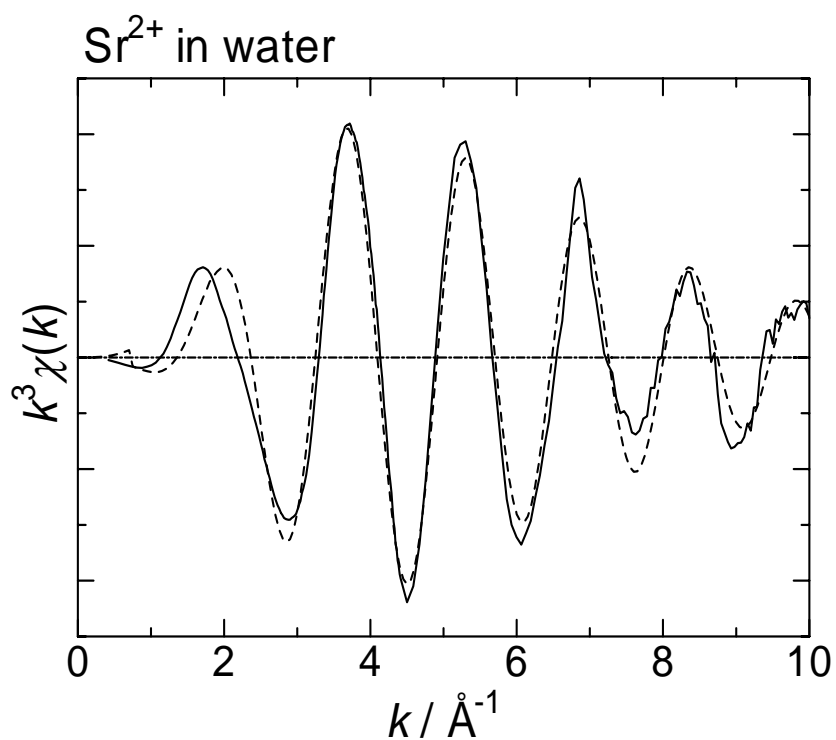

Fig.E7 XAFS spectrum for hydrated  $\text{Sr}^{2+}$ . Solid curve, experimental spectrum. Broken curve, fitting with parameters listed in Table 1.

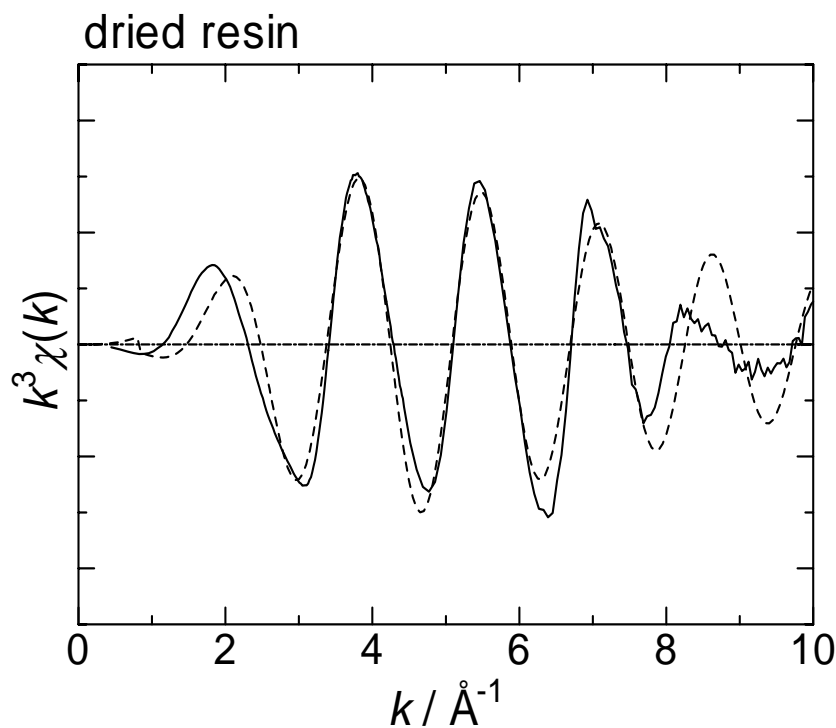

Fig.E8 XAFS spectrum for  $\text{Sr}^{2+}$  in the dried resin. Solid curve, experimental spectrum. Broken curve, fitting with parameters listed in Table 1.

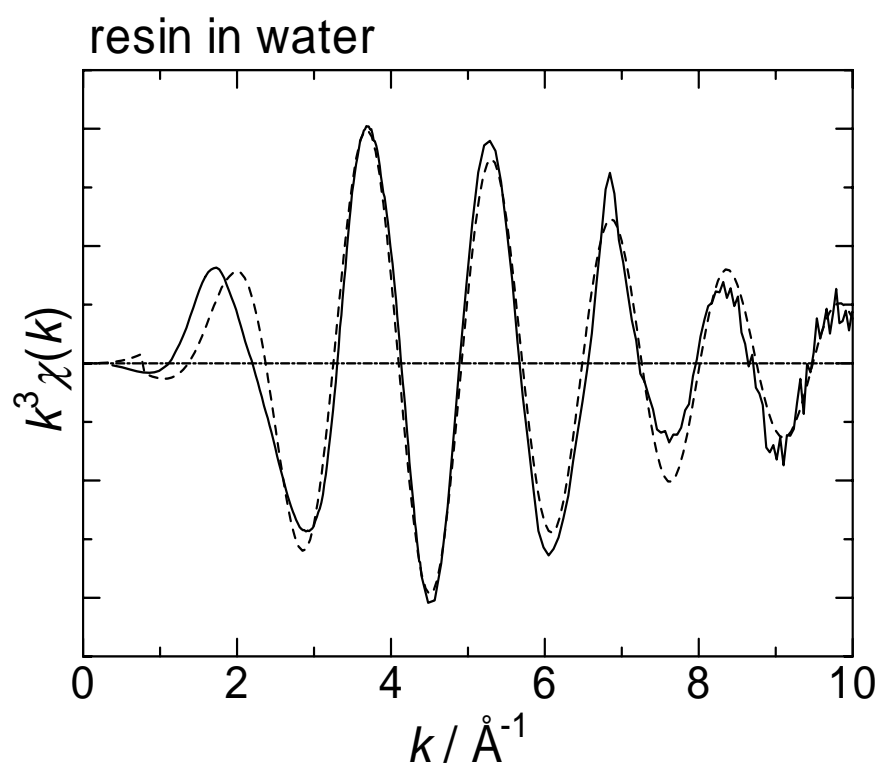

Fig.E9 XAFS spectrum for  $\text{Sr}^{2+}$  in the hydrated resin. Solid curve, experimental spectrum. Broken curve, fitting with parameters listed in Table 1.

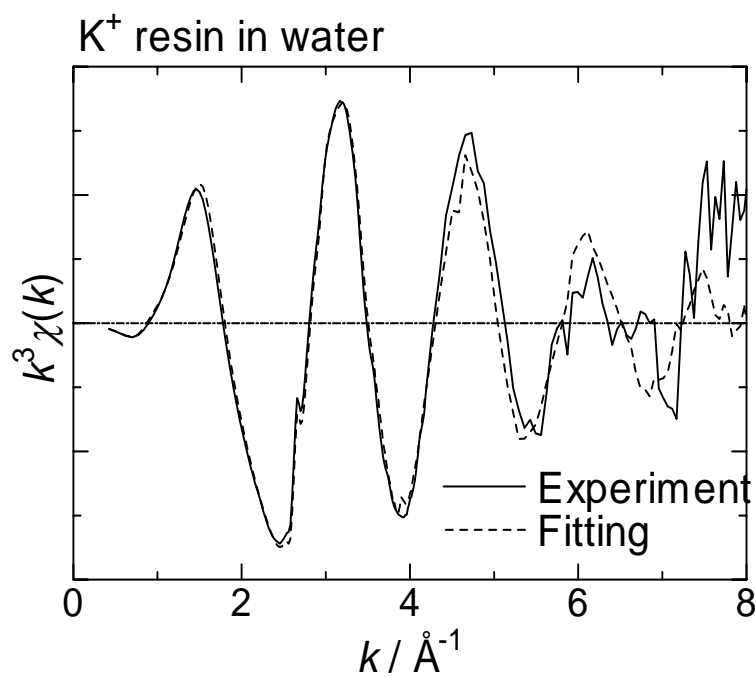

Fig.E10 Fitting with an equation,  $\chi = \alpha_1 \chi_1 + \alpha_2 \chi_2$ , for  $\text{K}^+$  in the hydrated resin.
